# Supplementary figures and images for: Inferential eye movement control while following dynamic gaze
Source: eLife journal article supplement (doi:10.7554/elife.83187), 2023-08-24

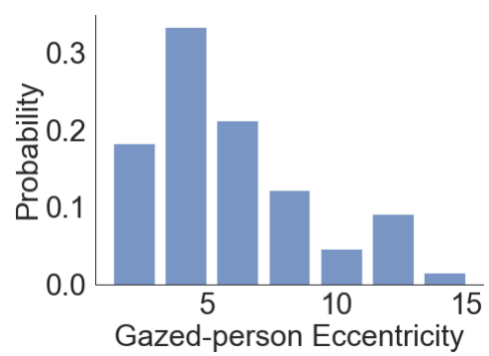

Supplement: supp [file elife-83187-supp-v1.zip]

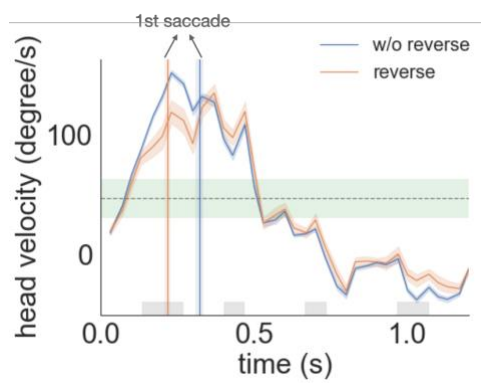

(a)

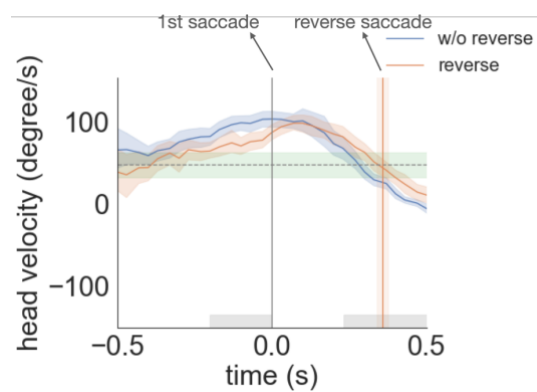

(b)

Supplement: supp [file elife-83187-supp-v1.zip]

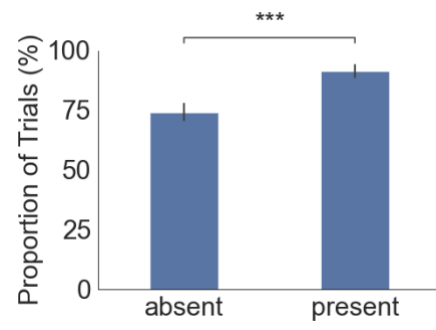

Supplement: supp [file elife-83187-supp-v1.zip]

Gazer vector  
distance

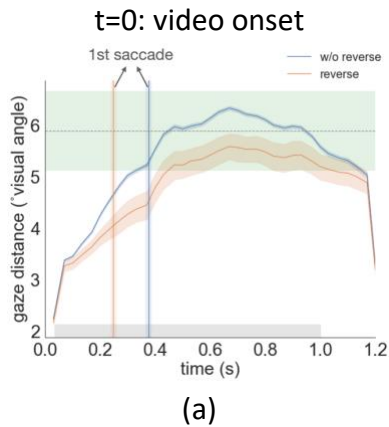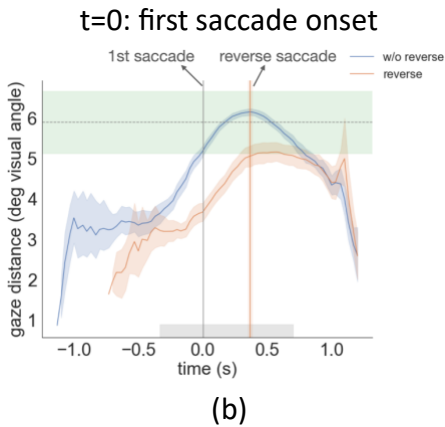

Angular  
Displacement

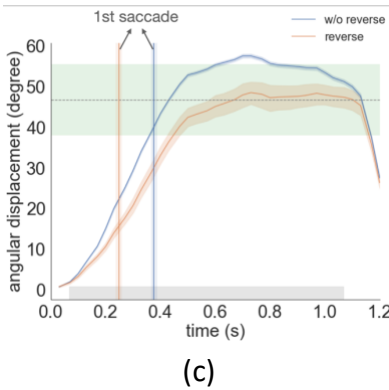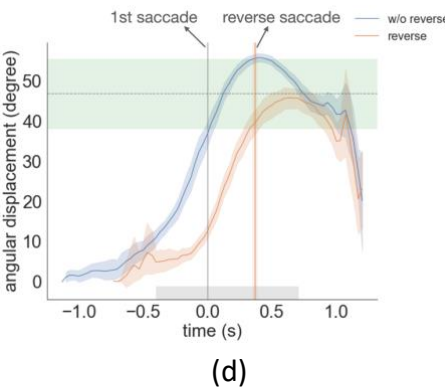

Head  
Acceleration

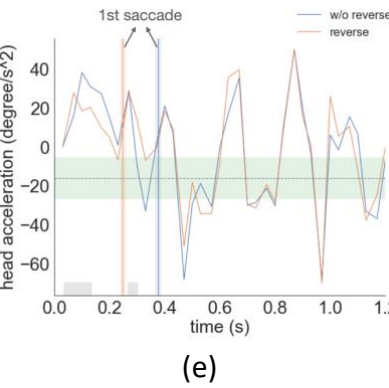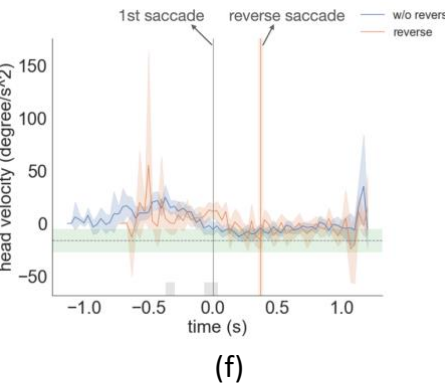

Supplement: supp [file elife-83187-supp-v1.zip]

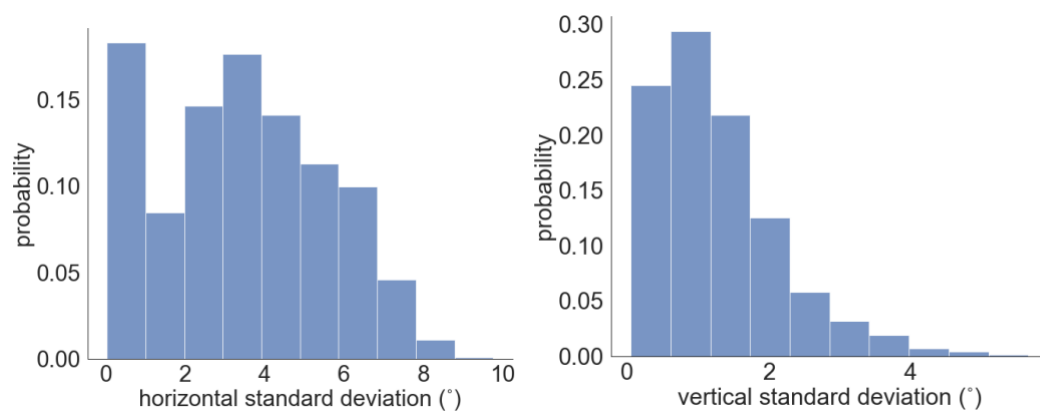

Supplement: supp [file elife-83187-supp-v1.zip]
